1

2 **Risk factors for anaemia among pregnant women: A cross-sectional study in**  
3 **Upper East Region, Ghana**

4

5 Clotilda Asobuno <sup>1,2 ¶\*</sup>, Silas Adjei-Gyamfi <sup>3 ¶</sup>, Felix Gumaayiri Aabebe <sup>4&</sup>, John Hammond <sup>5&</sup>,  
6 Chansathit Taikeophithoun <sup>6&</sup>, Norbert Ndaah Amuna <sup>7</sup>, Tsunoneri Aoki <sup>1</sup>, Hirotsugu Aiga <sup>1 ¶</sup>

7

8 <sup>1</sup> School of Tropical Medicine and Global Health, Nagasaki University, Nagasaki, Japan.

9 <sup>2</sup> Kassena Nankana West District Health Directorate, Ghana Health Service, Paga, Upper East  
10 Region, Ghana.

11 <sup>3</sup> Savelugu Municipal Hospital, Ghana Health Service, Savelugu, Northern Region, Ghana.

12 <sup>4</sup> Ahafo Regional Health Directorate, Ghana Health Service, Goaso, Ahafo Region, Ghana.

13 <sup>5</sup> Central Regional Health Directorate, Ghana Health Service, Cape Coast, Central Region,  
14 Ghana.

15 <sup>6</sup> Faculty of Public Health, University of Health Sciences, Vientiane, Lao PDR.

16 <sup>7</sup> School of Public Health, University of Health and Allied Sciences, Ho, Volta Region, Ghana.

17

18 **\*Corresponding author**

19 Email: [clotildaasobuno@gmail.com](mailto:clotildaasobuno@gmail.com) (CA)

20

21 **Short title**

22 Risk factors for anaemia in Ghana

23

NOTE: This preprint reports new research that has not been certified by peer review and should not be used to guide clinical practice.

24

## Abstract

### 25 **Background:**

26 Anaemia in pregnancy (AIP) is a public health concern due to its devastating effects on  
27 women and their unborn babies, resulting in increased maternal and neonatal deaths in  
28 developing countries. Despite several Ghanaian health policies to combat AIP, AIP is still on  
29 the rise. It becomes imperative to identify geographic-specific factors for developing  
30 appropriate interventions for the management of AIP. However, Kassena Nankana West  
31 District (KNWD) in the Upper East Region of Ghana lacks a study on anaemia risk factors,  
32 therefore, this study estimated the prevalence and risk factors for anaemia among pregnant  
33 women in the district.

34

### 35 **Methods:**

36 A household-based cross-sectional study was conducted on 376 pregnant women in their  
37 third trimester from February to March 2023. Anthropometric, obstetric, sociodemographic,  
38 and health facility resource characteristics were collected using structured questionnaires  
39 and antenatal records. Mixed-effect logistic regression was used to identify independent  
40 factors of anaemia at 95% confidence interval.

41

### 42 **Results:**

43 Prevalence of AIP was 53.9%. Mild, moderate, and severe anaemia prevalence was 16.9%,  
44 35.3%, and 1.7% respectively. Malaria infection during pregnancy (aOR=1.563; 95%CI:1.087  
45 – 2.475) and accessing health facilities without trained laboratory personnel (aOR=5.271;  
46 95%CI:1.641 – 16.93) were associated with increased odds of AIP. Belonging to the major  
47 ethnic group (aOR=0.431; 95%CI:0.280 – 0.675), accessing health facilities without

48 laboratory services (aOR=0.151; 95%CI:0.047 – 0.487), and accessing health facilities  
49 without sulphadoxine-pyrimethamine drugs (aOR=0.234; 95%CI:0.061 – 0.897) in KNWD  
50 were also associated with decreased odds of AIP.

51

52 **Conclusion:**

53 AIP prevalence remains high in the KNWD. Maternal and health facility-related factors were  
54 responsible for anaemia in the district. These factors are preventable. Therefore, health  
55 facility strengthening and enhanced strategies for malaria prevention are recommended for  
56 anaemia control in the district.

57

58  
59  
60  
61  
62  
63  
64  
65  
66  
67  
68  
69  
70  
71  
72  
73  
74  
75  
76  
77  
78  
79  
80

## Keywords

Anaemia,  
Anaemia in pregnancy,  
Pregnant women,  
Prevalence,  
Northern Ghana,  
Risk factors

## Number of words

|           |             |
|-----------|-------------|
| Abstract  | 272 words   |
| Main text | 3,519 words |

81  
82  
83  
84  
85  
86  
87  
88  
89  
90  
91  
92  
93  
94  
95  
96  
97  
98  
99  
100  
101  
102  
103  
104

## Introduction

Anaemia affects all populations in the world, especially pregnant women, and women in their reproductive age (1). It is one of the most severe and prevalent nutritional deficiencies of public health concern among pregnant women in low and middle-income countries (LMICs) (2). The World Health Organization (WHO) describes anaemia in pregnancy (AIP) as decreased haemoglobin (Hb) level of <11g/dL and is further classified into severe, moderate, and mild (3). Globally, 50,000 young women die each year in pregnancy and childbirth due to anaemia (4). In sub-Saharan Africa and Southern Asia, anaemia contributes to about 20% of all maternal and perinatal mortalities (3). Additionally, anaemia does not only reduce work productivity during pregnancy but also leads to adverse pregnancy outcomes such as low birth weight, premature delivery, stillbirths, postpartum haemorrhage, and postpartum morbidities (3,5–7).

Globally, anaemia is disproportionately distributed and affects about 40% to 60% of all pregnant women in LMICs (5). This high prevalence of LMICS is associated with iron deficiency thereby causing more than 50% of pregnancy-related anaemia cases and affecting nearly two billion population across the globe (3,8). A systematic review analysis in some LMICs including Burundi, Togo, and India reported a composited 50.3% prevalence of anaemia. The same study projected that, by 2025 anaemia prevalence among pregnant women in those countries (Burundi, Togo, and India) would reach 66.8%, 60.4%, and 60.3% respectively (9). In Ghana, the Demographic and Health Survey in 2014 estimated anaemia among pregnant women in the country at 45% (10) while a retrospective study in northern part of the country reported anaemia prevalence of 50.8% (11). Data from the Kassena-Nankana West District Health Directorate indicates that from 2018 to 2021 the proportion

105 of registrants with anaemia during antenatal care had significantly increased from 33% to  
106 46%. Moreover, the trend prevalence of gestational anaemia at the third trimester of  
107 pregnancy in the same district was 31%, 46.5%, 46.3%, and 50.9% from 2018 to 2021 (12).  
108 This highlights the need to conduct studies to identify factors associated with anaemia in  
109 the district.

110

111 Several policies and strategies on anaemia prevention have been adopted by many  
112 developing countries in the world. The global strategy for anaemia reduction included  
113 vector elimination via the distribution of insecticide-treated bed nets, provision of  
114 chemoprophylaxis treatment, and periodic treatment with anthelmintic for all women of  
115 childbearing age including pregnant women in endemic areas (1,3,8,11). Another strategy is  
116 girls' iron folic acid tablet supplementation to prevent anaemia, especially in areas with  
117 increasing adolescent deliveries and early marriages (4). Iron and folic acid supplementation  
118 for pregnant and postpartum women have been evidenced to yield optimal results in the  
119 prevention of anaemia (3,4). Additionally, Scaling Up Nutrition (SUN) Movement (Strategy  
120 3.0) has created a positive impact on nutrition through education, water, hygiene practices,  
121 and environmental sanitation, as well as strengthening food, health, and social protection  
122 systems in most developing countries (13). Ghana has utilized the SUN concept in  
123 community-based health planning and services (CHPS) implementation to reach out to all  
124 populations. This initiative brought health services to the doorsteps of the people for health  
125 workers to identify and manage minor illnesses including anaemia among pregnant women  
126 in Ghana. Despite these policy efforts, anaemia is still on the rise (11,14).

127

128 The contributing factors of anaemia in pregnancy are largely classified into individual,  
129 cultural, nutritional, socioeconomic, and infection-related factors (5,8). Some reported  
130 studies in LMICs regarded human immunodeficiency virus infection, primigravida,  
131 multiparity, and teenage pregnancies as prominent determinants of anaemia during  
132 pregnancy (5,11,15–18). In Africa and Ghana, some predictors of anaemia during gestation  
133 are elderly pregnant women, low household wealth index, and illiteracy (no formal  
134 education) (5,19,20). In the Kassena-Nankana West District (KNWD), relevant scientific  
135 studies on risk factors of pregnancy-related anaemia for informing appropriate  
136 interventions are lacking. It is not clear whether there are some service delivery factors,  
137 inherent maternal factors, and lack of client adherence to medications that are leading to  
138 the persistent rise in anaemia among these pregnant women. Notwithstanding, most  
139 studies in Ghana do not consider health facility-related determinants of anaemia for making  
140 informed decisions (11,14,20). It becomes more prudent to dig into health facility-based and  
141 maternal determinants that could be associated with anaemia during the period of  
142 pregnancy. This study therefore seeks to estimate the prevalence and risk factors of  
143 anaemia among pregnant women in the KNWD, Upper East Region (UER) of Ghana.

144

145

146

147

148

149

150

151

152

## Materials and Methods

### 153 Study design

154 This study was a household cross-sectional study conducted to estimate anaemia  
155 prevalence and identify the risk factors for anaemia among pregnant women in KNWD of  
156 UER, Ghana.

157

### 158 Study area

159 The study was conducted at KNWD in the UER of Ghana which was carved out of Kassena-  
160 Nankana Municipality in 2007 and launched on 29<sup>th</sup> February 2008. This district's 2021  
161 population projected from the National Population and Housing Census was 89,043 with a  
162 yearly growth rate of 2.4% (21). KNWD shares a border with Balsa District in the southwest,  
163 Sisala District in the west, and Burkina Faso in the north, Bongo and Bolgatanga Districts in  
164 the east and northeast respectively. There are two main climatic seasons found in the  
165 district; a dry season and a rainy season with average rainfall between 850 – 1000mm.  
166 Kassenas and the Nankanas are the two prominent ethnic groups. The major income source  
167 in the district is farming and petty trading. There are nine health centers, one district  
168 hospital as a referral center, 51 CHPS compounds, and 3 private health facilities (12). These  
169 facilities provide health services to all 115 communities in the district (21). The total  
170 antenatal care (ANC) visits in 2021 was 17,566. The total number of women in their  
171 reproductive age is estimated at 21,370 (24%), with yearly estimated pregnancies of 3,562  
172 (4%) (12).

173

### 174 Study population



175 This study interviewed 395 pregnant women who were registered and attending antenatal  
176 care in the district. Pregnant women having maternal and child health record books  
177 (MCHRBs) and were in their third trimester, were included in the study. Those with  
178 haematological problems or who were seriously sick during data collection were excluded  
179 from the study.

180

### 181 **Sample size and sampling methods**

182 The sample size (n) was calculated using the Cochran formula (22);  $n = \frac{Z_{\alpha/2}^2 \times p(1-p)}{d^2}$

183 The study employed the prevalence (p) of AIP in a neighbouring district (Kassena Nankana  
184 East Municipal) in the UER of Ghana estimated at 42.7% (14), margin error (d) of 5%, and  
185 standard normal variate ( $Z_{\alpha/2}$ ) at 95% confidence level of 1.96, the sample size was initially  
186 estimated at 376. Due to incomplete responses, 5% of the sample size was added (7) to  
187 produce an approximated final sample size of 395 (= 376/ [1 – 0.05]).

188 Of the 64 health facilities in the KNWD, only 10 health facilities provide daily ANC services in  
189 the district. During sampling, these 10 major health facilities were selected for the study.

190 Probability proportional to size technique was used to determine the sample sizes for each  
191 health facility. Each facility's ANC register was obtained to line-list all pregnant women who  
192 were eligible to form a sampling frame. Thereafter, a simple random sampling method was  
193 used to select the respondents from each health facility. The addresses (including contact  
194 numbers) of the recruited respondents were then taken to trace these respondents to their  
195 homes.

196

### 197 **Data collection**

198 A pretested structured questionnaire was used to collect the data from the selected health  
199 facilities and pregnant women in the comfort of their homes in February and March 2023.  
200 The questionnaire was designed using Kobo collect. Data was first collected on health  
201 facility's resources for anaemia measurement and prevention including laboratory services  
202 on blood testing, and availability of iron and folic acid (IFA) supplements, sulphadoxine-  
203 pyrimethamine (SP) drugs, and MCHRBs. The next phase of the data collection was at the  
204 households of respondents. Before household data collection commenced, the trained  
205 research assistants obtained the addresses and contacts (telephone numbers) of  
206 respondents and/or representatives from the ANC register. The midwives in each facility  
207 helped the research assistants to obtain this information. The research assistants then  
208 visited the homes of the recruited respondents after booking an appointment with them.  
209 Data on Hb levels, antenatal, and anthropometry were confirmed from the MCHRBs, and  
210 other information including sociodemographic, obstetric, and socioeconomic characteristics  
211 were collected through structured interviews.

212

### 213 **Study variables**

214 The dependent variable for this study was AIP in the third trimester classified as; (i) Anaemia  
215 (Hb: < 11 g/dl) and (ii) No anaemia (Hb:  $\geq$  11 g/dl). Anaemia status was further classified into  
216 mild (Hb: 10.0 –10.9g/dl), moderate (Hb: 7 – 9.9 g/dl), and severe anaemia (Hb: < 7 g/dl) (3).  
217 The sociodemographic, socioeconomic, anthropometric, antenatal, obstetric, and  
218 availability of resources for anaemia measurement and prevention at the health facilities  
219 were the independent variables. Most of the independent variables including iron-folic acid  
220 intake, anthelmintic drugs intake, SP doses intake, human immunodeficiency virus (HIV)  
221 infection, malaria during pregnancy, and availability of health facility resources (SP, iron folic

222 acid, anthelmintics, antimalaria drugs, functional laboratory machines, and trained  
223 laboratory personnel) were grouped as Yes/No. Pre-pregnancy (first-trimester) BMI was  
224 classified into underweight ( $< 18.5 \text{ kg/m}^2$ ), normal ( $\geq 18.5$  to  $24.9 \text{ kg/m}^2$ ), and  
225 overweight/obese ( $\geq 25.0 \text{ kg/m}^2$ ) using the WHO classification (23). Gravida was grouped  
226 into primigravida (0–1 pregnancy) and multigravida ( $\geq 2$  pregnancies). Parity was classified  
227 into primipara (0–1 delivery) and multipara ( $\geq 2$  deliveries) (6). Based on maternal  
228 gestational age, ANC initiation was summarized into first ( $\geq 13$  weeks), second (14 – 27  
229 weeks), and third (28 – 41 weeks) trimesters (23). By employing principal component  
230 analysis, the wealth index of respondents was assessed using household properties and  
231 housing quality which was used as a proxy indication for socioeconomic status of the  
232 respondents. The wealth index was then categorized into five quintiles namely: poorest,  
233 poorer, middle, richer, and richest (6). Other variables such as ethnic group, religion,  
234 educational level, occupation, marital status, and household size were also summarized and  
235 categorized based on previous studies (1,6,7)

236

### 237 **Statistical analysis**

238 Statistical analysis was conducted using STATA version 17.0 (Stata Corporation, Texas, USA)  
239 with all analyses determined at 95% confidence level. Chi-square or Fischer’s exact test was  
240 used to determine the bivariate association between anaemia status and each independent  
241 variable. In the multivariate analyses, mixed-effect logistic regression was used to identify  
242 risk factors for AIP by applying a simultaneous variables entry. The study used mixed-effect  
243 logistic regression because majority of the independent variables were nested at the health  
244 facilities level. All independent variables with significant bivariate association with anaemia  
245 ( $p < 0.05$ ) were chosen as possible predictor variables for logistics analyses. Multicollinearity

246 was checked among the predictor variables before employing them in the multivariate  
247 analyses. Variance Inflation factor and Spearman’s correlation coefficient were used during  
248 multicollinearity testing.

#### 249 **Ethical considerations**

250 The study obtained ethical clearance from the Nagasaki University School of Tropical  
251 Medicine and Global Health (TMGH) Institutional Review Board (approval  
252 number:NU\_TMGH\_2022\_225\_1), and the Ghana Health Service Ethics Review Committee  
253 (approval number: GHS-ERC:023/12/22). Permission was obtained from the UER Health  
254 Directorate, KNWD Health Directorate, and Heads of the health facilities before the data  
255 was collected. Written informed consent was obtained from all respondents and/or their  
256 parents/guardians after they were given information on the purpose of the study and what  
257 was required of them as study participants.

258

259

260

261

262

263

264

265

266

267

268

269

270

271

272

273

274

275

276

277

## Results

278 A total of 395 respondents were interviewed. However, 19 incomplete questionnaires were

279 found during data cleaning. Hence, 376 respondents were used for the data analysis.

280

### 281 **Socio-demographic, antenatal, and obstetric characteristics of study participants**

282 The ages of the pregnant women ranged from 16 to 50 years, with a mean age of 27 years

283 (sd=6.28). A greater number of the respondents were married (93%) and were Christians

284 (85%). The respondents were predominantly from the Kassena ethnic group (55%), while

285 slightly above half of them were unemployed (51%). About 10% of them had no formal

286 education ([Table 1](#)). More than one-quarter of the women (27%) received IFA tablets from

287 their health facilities. While 76% of the pregnant women slept under ITNs the night before

288 the interview, one-quarter of them (25%) had taken at least four doses of SP during

289 pregnancy. Slightly above one-third of the women (35%) experienced malaria during their

290 pregnancy period ([Table 2](#)).

291

### 292 **Availability of health facilities' resources for anaemia measurement and prevention during**

#### 293 **antenatal visits**

294 Over half of the pregnant women made ANC visits to health facilities without functional

295 laboratory services (54%), while those who attended health facilities without haemoglobin

296 testing machines were nearly one-third (30%). A greater proportion of pregnant women

297 received ANC services from health facilities without trained laboratory personnel. More

298 than half of the pregnant women (62%) accessed the health facilities having no stock of  
299 MCHRBs. Furthermore, 79% of the respondents accessed ANC in the health facilities having  
300 no stock of IFA supplements. Few pregnant women (12%) did not receive SP drugs from  
301 facilities they visited for ANC services (Table 3).

302

### 303 **Prevalence of anaemia among study participants**

304 The mean haemoglobin level was found to be 10.85 g/dl (sd=1.36). The prevalence of anaemia  
305 was 53.9% (95%CI:48.5% – 58.8%) which was classified into mild, moderate, and severe  
306 anaemia corresponding to 16.9%, 35.3%, and 1.7% respectively (Table 1).

307

### 308 **Association of anaemia with exposure variables**

309 As shown in Tables 1, 2, and 3, ethnicity ( $p = 0.002$ ), malaria during pregnancy ( $p = 0.006$ ),  
310 accessing health facilities without laboratory services ( $p = 0.023$ ), accessing health facilities  
311 without haemoglobin testing machines ( $p = 0.021$ ), accessing health facilities without trained  
312 laboratory personnel ( $p = 0.024$ ), and accessing health facilities without SP drugs ( $p = 0.040$ )  
313 were associated with anaemia at the bivariate level.

314

### 315 **Associated risk factors for anaemia in pregnancy**

316 After chronicling no multicollinearity issues among the six predictor variables that shown  
317 significant bivariate association with anaemia status, five of them namely ethnicity, malaria  
318 during pregnancy, accessing health facilities without laboratory services, accessing health  
319 facilities without trained laboratory personnel, and accessing facilities without SP drugs  
320 remained statistically significant at the multivariate analysis level (Table 4).

321 The findings suggest that pregnant women who had malaria infection during pregnancy had  
322 1.563 times increased risk of getting anaemia (aOR=1.563; 95%CI:1.087 – 2.475). Women  
323 belonging to Kassena ethnic group had a reduced risk of anaemia, indicating 56.9% ([1 –  
324 0.431] x 100) reduction in anaemia (aOR=0.431; 95%CI:0.280 – 0.675). Additionally, pregnant  
325 women who accessed health facilities without laboratory services (aOR=0.151; 95%CI:0.047  
326 – 0.487) and without stock of SP drugs to supply to pregnant women (aOR=0.234;  
327 95%CI:0.061 – 0.897) had decreased odds for anaemia. Lastly, pregnant women who visited  
328 health facilities without trained laboratory personnel were more likely to be anaemic  
329 (aOR=5.271; 95%CI:1.641 – 16.93).

330

331

332

333

334

335

336

337

338

339

340

341

342

343

344

345

346

347

348

## Discussion

349 AIP is a global public health concern due to its consequences on the lives of women and  
350 unborn babies such as low birth weight, preterm births, stillbirths, and maternal deaths  
351 (6,7,24,25). The World Health Assembly aims to reduce anaemia by 50% in 2025 (3), which  
352 motivates most countries to identify and address factors responsible for anaemia during  
353 pregnancy. Hence, this household-based cross-sectional study was conducted to estimate  
354 anaemia prevalence and the possible risk factors among pregnant women in KNWD.

355 This study's mean haemoglobin level was 10.85g/dl with anaemia prevalence of 53.9%. Our  
356 study's anaemia prevalence was higher than the global and East African prevalence of 41.8%  
357 (9,26) and the prevalence reported by the 2014 Ghana Demographic and Health Survey (42%),  
358 Sunyani municipality (40.8%), and Hohoe municipality (32.7%) of Southern Ghana (20,27,28).  
359 Furthermore, previous studies in Northern Ghana reported a similar prevalence to that of the  
360 present study (5,11) while a similar study in Northern Tanzania reported higher anaemia rate  
361 of 81.3% (29). Paired with this study's results, diversities in the cultural settings, beliefs, and  
362 economic activities between the southern and northern parts of Ghana and across Africa  
363 might be the reason for variations in the anaemia prevalence. Also, the variations in anaemia  
364 status among participants could be explained by several factors including the type of ethnic  
365 group, malaria infection, and accessing health facilities without laboratory services, trained  
366 laboratory personnel, and SP drugs which were found to be statistically associated with  
367 anaemia during pregnancy in this study.

368



369 Women belonging to the major ethnic group offered protection against anaemia during  
370 pregnancy. Kassena serves as the major ethnic group in the KNWD. This study result is  
371 similar to other study findings in Israel (30) and Denmark (31,32). The Kassena ethnic group  
372 is mostly found in the capital town of the district, where most women practice petty trading  
373 and are economically better off compared to other ethnic groups in the KNWD (11). This  
374 might influence their food purchasing, food intake, and health-seeking behavior which could  
375 reduce the risk of anaemia among the Kassena pregnant women.

376

377 The study showed that women with malaria during pregnancy had an increased risk of  
378 anaemia. Similar to a study in Southern Ghana (28), malaria in pregnancy is associated with  
379 anaemia while some cross-sectional studies in Northern Ghana (5,14) are incongruent.  
380 Africa remains the breeding ground for malaria parasites especially in tropical areas like  
381 Ghana (28,33). In 2010, malaria contributed to the majority of all deaths and about 11% of  
382 maternal deaths in Ghana (33). Malaria during pregnancy affects the maternal and foetal  
383 tissues and breaks down the formation of maternal erythrocytes leading to anaemia (33,34)  
384 and consequently resulting in adverse pregnancy outcomes such as low birth weight and  
385 premature deliveries (6,7,35). Ghana adopted WHO-recommended strategies for malaria  
386 control such as the distribution of insecticide-treated bed nets and chemoprophylaxis  
387 treatment via the intake of SP drugs for the prevention of malaria through the free maternal  
388 care policy (20,36). However, commitment and adherence to these interventions in KNWD  
389 may be suboptimal which could predispose the women to malaria and risk them for  
390 anaemia during pregnancy.

391

392 Pregnant women who attended ANC services at health facilities without trained laboratory  
393 personnel were at higher risk of developing anaemia. The present study's finding is parallel  
394 to a similar study in Tanzania (37). This finding could occur as untrained laboratory persons  
395 are more likely to wrongly read, interpret, and report laboratory results due to a lack of  
396 technical expertise which may risk pregnant women from receiving the appropriate  
397 interventions for possible anaemia detection.

398

399 Our study revealed that pregnant women who accessed ANC services at health facilities  
400 without laboratory services were less likely to develop anaemia. Laboratory services are  
401 essential for the early detection, diagnosis, and monitoring of anaemia in pregnancy. These  
402 services facilitate targeted interventions, such as iron supplementation and nutritional  
403 counseling, which are vital in preventing maternal and foetal complications associated with  
404 anaemia (20,38,39). Timely and appropriate use of laboratory tests significantly contributes  
405 to the overall better health outcomes of pregnant women and their unborn foetus. Despite  
406 the enormous importance of availability of laboratory services in curbing anaemia in  
407 pregnancy, majority of the health facilities in Kassena-Nankana West district do not have the  
408 basic laboratory equipment to conduct the services. Therefore, all pregnant women who  
409 attended health facilities without laboratory services are given referrals to the facilities with  
410 laboratory services to conduct haemoglobin and other laboratory tests. The laboratory  
411 service may be an indirect determinant of anaemia; however, it could depend on the ability  
412 of the pregnant women to adhere to the preventive and treatment protocol given to them  
413 following the test results that may determine the anaemia status of the women.

414

415 Lastly, women attending health facilities without SP drugs as unexpected were protected  
416 against anaemia during pregnancy which is inconsistent with a report from McClure and  
417 colleagues who asserted that facilities with higher stock of SP drugs reduced the risk of  
418 maternal anaemia (40). SP drugs are known for their efficacy in preventing and treating  
419 malaria during pregnancy, which serves as a significant risk factor for anaemia (33,36). So, a  
420 pregnant woman who religiously adheres to SP intake and other malaria preventive  
421 measures tends to protect against malaria and anaemia (20,36). Facilities without SP drugs  
422 may be an indirect contributor to anaemia in pregnancy, hence further studies should  
423 consider health facilities' impact on anaemia by assessing the SP stock level.

424

#### 425 **Limitations of the study**

426 Sampling bias due to exclusion of pregnant women who lost or not having their MCHRBS,  
427 because the study collected some data directly from the MCHRBS. Additionally, pregnant  
428 women who were not in their third trimester were excluded from this study which could  
429 affect sampling and anaemia prevalence. This study collected secondary data on  
430 haemoglobin levels, obstetric, and anthropometric characteristics documented in the  
431 MCHRBS as some of the data may be inaccurate due to mis-recording or mismeasurement  
432 leading to information bias. The study could not be generalized and may need a larger  
433 sample size to determine rare risk factors of anaemia. Lastly, since it is a cross-sectional  
434 study, it might not measure the seasonal findings of AIP.

435

436

437

438

439

440

441

442

443

## Conclusion

444 AIP was very high in the KNWD which were affected by maternal ethnic group, malaria  
445 during pregnancy, and health facilities-related factors. Enhancing malaria prevention and  
446 treatment measures is essential for addressing some of these factors in KNWD. Ghana  
447 Health Service should recruit more laboratory personnel and periodically conducts in-service  
448 training to update the staff on haemoglobin testing. Moreover, Ghana Health Service should  
449 provide health facilities in hard-to-reach communities and peripherals with well-equipped  
450 laboratories for testing haemoglobin and other laboratory tests to increase accessibility for  
451 minor ethnic groups and provide a conducive environment for anaemia treatment protocol.  
452 We recommend that future larger studies should be conducted to assess health facilities-  
453 related factors on anaemia during pregnancy.

454

455

456

457

458

459

460

461

462

463

464  
465  
466  
467  
468  
469  
470  
471  
472  
473  
474  
475  
476  
477  
478  
479  
480  
481  
482  
483  
484  
485  
486  
487  
488  
489  
490

## Acknowledgements

The authors are very thankful to The Project for Human Resource Development Scholarship - Japan International Cooperation Agency (JICA); Nagasaki University School of Tropical Medicine and Global Health – Japan; and Kassena Nankana West District Health Directorate, Ghana Health Service – Ghana, for supporting this study. Our gratitude also goes to all data collectors, research respondents, and volunteers who greatly contributed to this study.

491

492

493

494

495

496

## References

- 497 1. Pobee RA, Setorglo J, Klevor M, Murray-Kolb LE. The prevalence of anemia and iron  
498 deficiency among pregnant Ghanaian women, a longitudinal study. PLoS One  
499 [Internet]. 2021;16(3 March):1–14. Available from:  
500 <http://dx.doi.org/10.1371/journal.pone.0248754>
- 501 2. Semedo RML, Santos MMAS, Baião MR, Luiz RR, Da Veiga G V. Prevalence of Anaemia  
502 and Associated Factors among Children below Five Years of Age in Cape Verde, West  
503 Africa. J Heal Popul Nutr. 2014;32(4):646–57.
- 504 3. World Health Organization. Global anaemia reduction efforts among women of  
505 reproductive age: impact, achievement of targets and the way forward for optimizing  
506 efforts [Internet]. Geneva; 2020. Available from: <http://apps.who.int/iris>
- 507 4. UNICEF. UNICEF Conceptual Framework on Maternal and Child Nutrition, 2020  
508 [Internet]. Nutrition and Child Development Section, Programme Group. New York;  
509 2021. Available from: [www.unicef.org/nutrition](http://www.unicef.org/nutrition)
- 510 5. Tibambuya BA, Ganle JK, Ibrahim. Anaemia at antenatal care initiation and associated  
511 factors among pregnant women in west Gonja district, Ghana: A cross-sectional  
512 study. Pan Afr Med J. 2019;33.
- 513 6. Adjei-Gyamfi S, Musah B, Asirifi A, Hammond J, Aryee PA, Miho S, et al. Maternal risk  
514 factors for low birthweight and macrosomia: a cross-sectional study in Northern

- 515 Region, Ghana. *J Heal Popul Nutr* [Internet]. 2023;42(1):1–16. Available from:  
516 <https://doi.org/10.1186/s41043-023-00431-0>
- 517 7. Adjei-Gyamfi S, Asirifi A, Aiga H. Prevalence and Associated Risk Factors of Preterm  
518 and Post-term Births in Northern Ghana: A Retrospective Study in Savelugu  
519 Municipality. *J Pediatr Perinatol Child Heal* [Internet]. 2023 [cited 2024 Jan  
520 12];07(04):235–48. Available from: <https://doi.org/10.26502/jppch.74050169>
- 521 8. WHO. The Global Prevalence of Anaemia in 2011 [Internet]. Geneva; 2015 [cited 2019  
522 Oct 23]. Available from: [www.who.int](http://www.who.int)
- 523 9. Liyew AM, Tesema GA, Alamneh TS, Worku MG, Teshale AB, Alem AZ, et al.  
524 Prevalence and determinants of anemia among pregnant women in East Africa; A  
525 multi-level analysis of recent demographic and health surveys. *PLoS One* [Internet].  
526 2021;16(4 April 2021):1–15. Available from:  
527 <http://dx.doi.org/10.1371/journal.pone.0250560>
- 528 10. Ghana Statistical Service (GSS), Ghana Health Service (GHS) & II. Ghana Demographic  
529 and Health Survey 2014. Rockville, Maryland, USA; 2015.
- 530 11. Wemakor A. Prevalence and determinants of anaemia in pregnant women receiving  
531 antenatal care at a tertiary referral hospital in Northern Ghana. *BMC Pregnancy  
532 Childbirth*. 2019;19(1):1–11.
- 533 12. Ghana Health Service. DHIMS: District Information Management Systems version 2.  
534 [Internet]. 2022. Available from: [https://dhims.chimgh.org/dhims/dhis-web-  
535 dashboard/#/](https://dhims.chimgh.org/dhims/dhis-web-dashboard/#/)
- 536 13. Scaling Up Nutrition Movement. SUN 3.0: A Strategy to accelerate nutrition action  
537 and systemic change, 2021–2025. 2021.
- 538 14. Nonterah EA, Adomolga E, Yidana A, Kagura J, Agorinya I, Ayamba EY, et al.

- 539 Descriptive epidemiology of anaemia among pregnant women initiating antenatal  
540 care in rural Northern Ghana. *African J Prim Heal Care Fam Med*. 2019;11(1):1–7.
- 541 15. Sunuwar DR, Singh DR, Chaudhary NK, Pradhan PMS, Rai P, Tiwari K. Prevalence and  
542 factors associated with anemia among women of reproductive age in seven South  
543 and Southeast Asian countries: Evidence from nationally representative surveys. *PLoS*  
544 *One* [Internet]. 2020;15(8 August):1–17. Available from:  
545 <http://dx.doi.org/10.1371/journal.pone.0236449>
- 546 16. Gedefaw L, Ayele A, Asres Y, Mossie A. Anemia and Associated Factors Among  
547 Pregnant Women Attending Antenatal Care Clinic in Wolayita Sodo Town, Southern  
548 Ethiopia. *Ethiop J Health Sci*. 2015 Apr 1;25(2):155–62.
- 549 17. Ampiah MKM, Kovey JJ, Apprey C, Annan RA. Comparative analysis of trends and  
550 determinants of anaemia between adult and teenage pregnant women in two rural  
551 districts of Ghana. *BMC Public Health*. 2019;19(1):1–9.
- 552 18. Kefiyalew F, Zemene E, Asres Y, Gedefaw L. Anemia among pregnant women in  
553 Southeast Ethiopia : prevalence , severity and associated risk factors, *BMC Research*  
554 *Notes* 2014, 7:771 <http://www.biomedcentral.com/1756-0500/7/771>. *BMC Res*  
555 *Notes* [Internet]. 2014;7(771):1–8. Available from:  
556 <https://bmcrsnotes.biomedcentral.com/articles/10.1186/1756-0500-7-771>
- 557 19. Sunuwar DR, Sangroula RK, Shakya NS, Yadav R, Chaudhary NK, Pradhan PMS. Effect  
558 of nutrition education on hemoglobin level in pregnant women: A quasi-experimental  
559 study. *PLoS One*. 2019 Mar 1;14(3).
- 560 20. Ghana Statistiscal Services (GSS). Ghana Demographic and Health Survey (GDHS).  
561 *Demogr Heal Surv* 2014 [Internet]. 2015;530. Available from:  
562 <https://dhsprogram.com/pubs/pdf/FR307/FR307.pdf>



- 563 21. Ghana Statistical Service. Ghana 2021 Population and Housing Census: General  
564 Report Volume 3A. Accra; 2021.
- 565 22. Cochran WG. Sampling Techniques. John Wiley & Sons, Inc. 1977. 448 p.
- 566 23. World Health Organization. WHO recommendations on antenatal care for a positive  
567 pregnancy experience. Geneva; 2016.
- 568 24. Noronha JA, Khasawneh E Al, Seshan V, Ramasubramaniam S, Raman S. Anemia in  
569 pregnancy-consequences and challenges: A review of literature. J SAFOG.  
570 2012;4(1):64–70.
- 571 25. Lestari S, Fujiati II, Keumalasari D, Daulay M, Martina SJ, Syarifah S. The prevalence of  
572 anemia in pregnant women and its associated risk factors in North Sumatera,  
573 Indonesia. IOP Conf Ser Earth Environ Sci. 2018;125(1).
- 574 26. McLean E, Cogswell M, Egli I, Wojdyla D, De Benoist B. Worldwide prevalence of  
575 anaemia, WHO Vitamin and Mineral Nutrition Information System, 1993-2005. Public  
576 Health Nutr. 2009;12(4):444–54.
- 577 27. Axame WK, Binka FN, Kweku M, Diaz D. Prevalence and Factors Associated with Low  
578 Birth Weight and Preterm Delivery in the Ho Municipality of Ghana. Adv Public Heal.  
579 2022;2022.
- 580 28. Anlaakuu P, Anto F. Anaemia in pregnancy and associated factors: a cross sectional  
581 study of antenatal attendants at the Sunyani Municipal Hospital, Ghana. BMC Res  
582 Notes. 2017 Aug 11;10(1):402.
- 583 29. Ngimbudzi EB, Massawe SN, Sunguya BF. The Burden of Anemia in Pregnancy Among  
584 Women Attending the Antenatal Clinics in Mkuranga District, Tanzania. Front Public  
585 Heal. 2021;9(December):1–9.
- 586 30. Levy A, Fraser D, Katz M, Mazor M, Sheiner E. Maternal anemia during pregnancy is

- 587 an independent risk factor for low birthweight and preterm delivery. *Eur J Obstet*  
588 *Gynecol Reprod Biol.* 2005 Oct 1;122(2):182–6.
- 589 31. Nybo M, Friis-Hansen L, Felding P, Milman N. Higher prevalence of anemia among  
590 pregnant immigrant women compared to pregnant ethnic Danish women. *Ann*  
591 *Hematol.* 2007;86(9):647–51.
- 592 32. Sullivan KM, Mei Z, Grummer-Strawn L, Parvanta I. Haemoglobin adjustments to  
593 define anaemia. *Trop Med Int Heal.* 2008;13(10):1267–71.
- 594 33. Wilson NO, Ceesay FK, Obed SA, Adjei AA, Gyasi RK, Rodney P, et al. Intermittent  
595 preventive treatment with sulfadoxine-pyrimethamine against malaria and anemia in  
596 pregnant women. *Am J Trop Med Hyg.* 2011 Jul;85(1):12–21.
- 597 34. Lagerberg RE. Malaria in Pregnancy: A Literature Review. *J Midwifery Women’s Heal.*  
598 2008;53(3):209–15.
- 599 35. Thurairasu V, Marimuthoo P, Kumareswaran S. A Pragmatic Approach to Anemia in  
600 Pregnancy: An Overview. *Eur J Med Heal Sci.* 2023;5(1):23–7.
- 601 36. Agyeman YN, Newton S, Annor RB, Owusu-Dabo E. Intermittent preventive treatment  
602 comparing two versus three doses of sulphadoxine pyrimethamine (IPTp-SP) in the  
603 prevention of anaemia in pregnancy in Ghana: A cross-sectional study. *PLoS One*  
604 [Internet]. 2021;16(4 April):1–17. Available from:  
605 <http://dx.doi.org/10.1371/journal.pone.0250350>
- 606 37. Nyamtema AS, Bartsch-de Jong A, Urassa DP, Hagen JP, van Roosmalen J. The quality  
607 of antenatal care in rural. *BMC Pregnancy Childbirth.* 2012;(December 2010).
- 608 38. Abu BAZ, Louw VJ, Dannhauser A, Raubenheimer J, Berg LV Van den. Knowledge  
609 attitudes and practices (KAP) regarding iron deficiency (ID) among mothers in an  
610 anemia endemic population in Northern region of Ghana. *Matern Child Nutr*

611 [Internet]. 2013 Nov 23 [cited 2020 Jun 3];9(S3):42–55. Available from:  
612 <https://onlinelibrary.wiley.com/doi/abs/10.1111/mcn.12094>

613 39. WHO. Weekly iron and folic acid supplementation as an anaemia-prevention strategy  
614 in women and adolescent girls Lessons learnt from implementation of programmes  
615 among non-pregnant women of reproductive age. World Heal Organ [Internet].  
616 2018;40. Available from:  
617 [https://www.who.int/nutrition/publications/micronutrients/WIFS-anaemia-](https://www.who.int/nutrition/publications/micronutrients/WIFS-anaemia-prevention-women-adolescent-girls/en/)  
618 [prevention-women-adolescent-girls/en/](https://www.who.int/nutrition/publications/micronutrients/WIFS-anaemia-prevention-women-adolescent-girls/en/)

619 40. McClure EM, Goldenberg RL, Dent AE, Meshnick SR. A systematic review of the impact  
620 of malaria prevention in pregnancy on low birth weight and maternal anemia. Int J  
621 Gynecol Obstet [Internet]. 2013;121(2):103–9. Available from:  
622 <http://dx.doi.org/10.1016/j.ijgo.2012.12.014>

623  
624  
625  
626  
627  
628  
629  
630  
631  
632  
633  
634

635

636

637

638

639

640

## **Abbreviations**

641 ANC: Antenatal care

642 AIP: Anaemia in pregnancy

643 BMI: Body mass index

644 CHPS: Community-based preventive services

645 Hb: Haemoglobin

646 HIV: Human immunodeficiency virus

647 IFA: Iron and folic acid

648 ITNs: Insecticide-treated bed nets

649 KNWD: Kassena Nankana West District

650 LMICs: Low-and middle-income countries

651 MCHRBs: Maternal and child health record books

652 SP: Sulphadoxine pyrimethamine

653 SUN: Scaling Up Nutrition

654 UER: Upper East Region

655

656

657

## **Availability of data and materials**

658 The data are available from the corresponding author upon reasonable request.

659

660

### 661 **Competing interests**

662 The authors declared that they have no competing interests

### 663 **Funding**

664 This study was supported by The Project for Human Resource Development Scholarship,  
665 Japan International Cooperation Agency (JICA), and Nagasaki University School of Tropical  
666 Medicine and Global Health, Japan.

667

### 668 **Authors' contributions**

669 CA, SAG, NNA, TA, and HA designed and conceptualized the study. CA, FGA, JH, and CT  
670 carried out the data collection as SAG, NNA, TA, and HA played supervisory roles. CA, SAG,  
671 FGA, JH, CT, and HA performed the data analysis and interpretation. CA, SAG, and HA  
672 drafted the initial manuscript. All authors reviewed and approved the final manuscript.

673

### 674 **Authors' acronyms**

675 Clotilda Asobuno (CA); Silas Adjei-Gyamfi (SAG); Felix Gumaayiri Aabebe (FGA); John  
676 Hammond (JH); Chansathit Taikeophithoun (CT); Norbert Ndaah Amuna (NNA); Tsunoneri  
677 Aoki (TA); Hirotsugu Aiga (HA).

678

### 679 **Supporting information**

680 S1 Table 1. Socio-demographic characteristics of respondents and prevalence of anaemia

- 681 S2 Table 2. Antenatal and obstetrics characteristics of respondents
- 682 S3 Table 3. Availability of health facilities' resources for anaemia measurement and  
683 prevention during antenatal visits
- 684 S4 Table 4. Mixed-effect logistic regression on the risk factors for anaemia in pregnancy  
685
